# Supplementary material for: Hydrothermal growth and optical properties of Nb2O5 nanorod arrays
Source: Royal Society of Chemistry journal article supplement (doi:10.1039/c4tc01581a), 2014-01-01
Supplement: c4tc01581a1.pdf [file c4tc01581a1.pdf]

## Supplementary Information

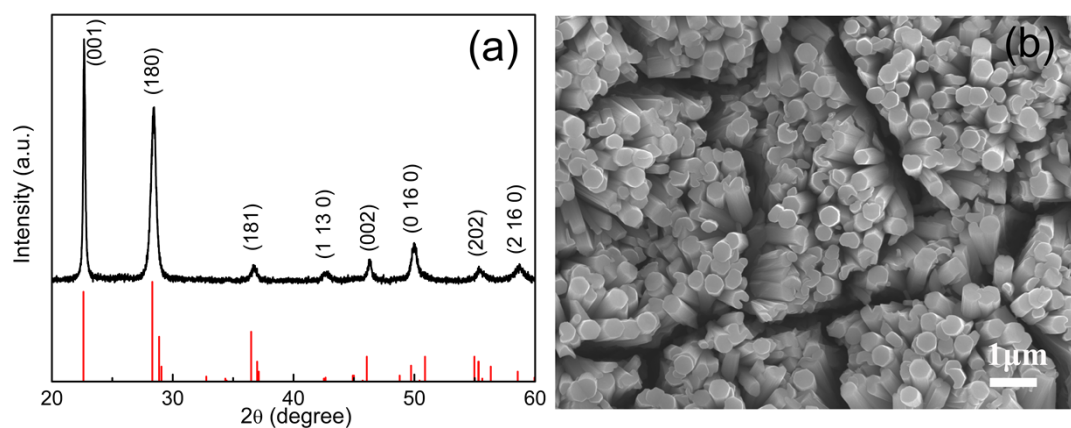

**Fig.1S** (a) XRD pattern and (b) SEM image of the samples synthesized by hydrothermal at 150 °C using 12.5M  $\text{NH}_4\text{F}$  and 20ml  $\text{H}_2\text{O}_2$  (30 wt.%) annealed at 500 °C in  $\text{O}_2$  atmosphere for 1 hour.

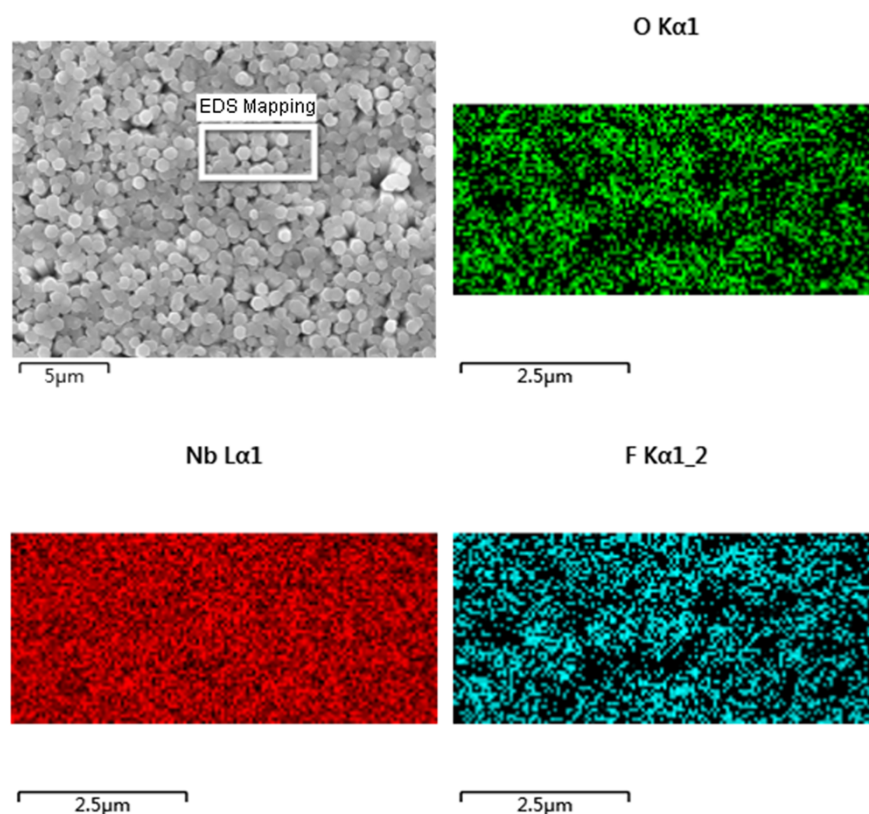

**Fig. 2S** EDS mapping results of sample obtained at 150°C with  $\text{NH}_4\text{F}$  concentration of 5.00 M and 20 ml  $\text{H}_2\text{O}_2$  (30wt.%)

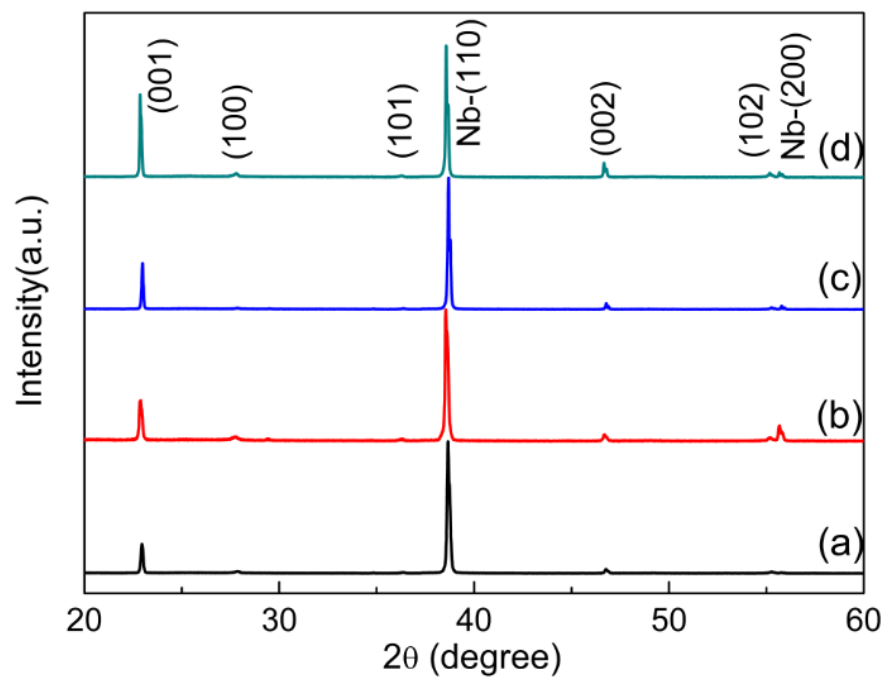

**Fig. 3S** XRD patterns of the  $\text{Nb}_2\text{O}_5$  nanorod arrays obtained by hydrothermal process at 150 °C for different reaction time. (a) 5h, (b) 10h, (c) 15h, (d) 20h.
